# Supplementary material for: Baicalein alleviates TNF-α-induced apoptosis of human nucleus pulposus cells through PI3K/AKT signaling pathway
Source: Springer Nature journal article supplement (doi:10.1186/s13018-023-03759-9), 2023-04-11

A

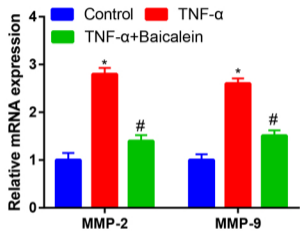

B

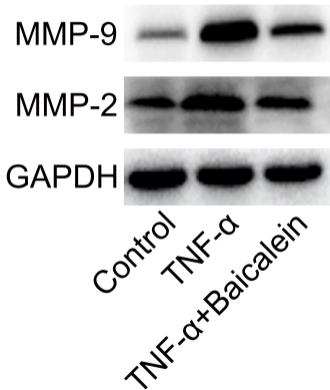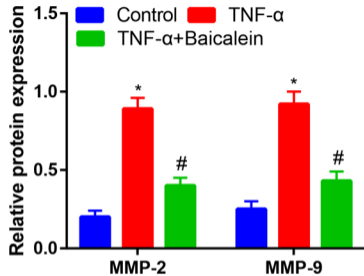

Supplement: MOESM2 [file 25238648]
